# Supplementary material
Source: PubMed Central journal article supplement (PMC4703423)
Supplement: NIHMS730596-supplement-2.pdf [file NIHMS730596-supplement-2.pdf]

Figure S2: Analysis of DKO#18 ESC Line

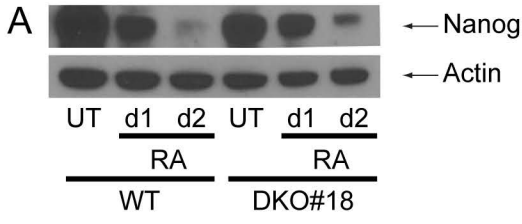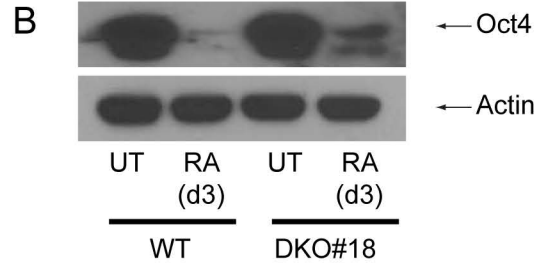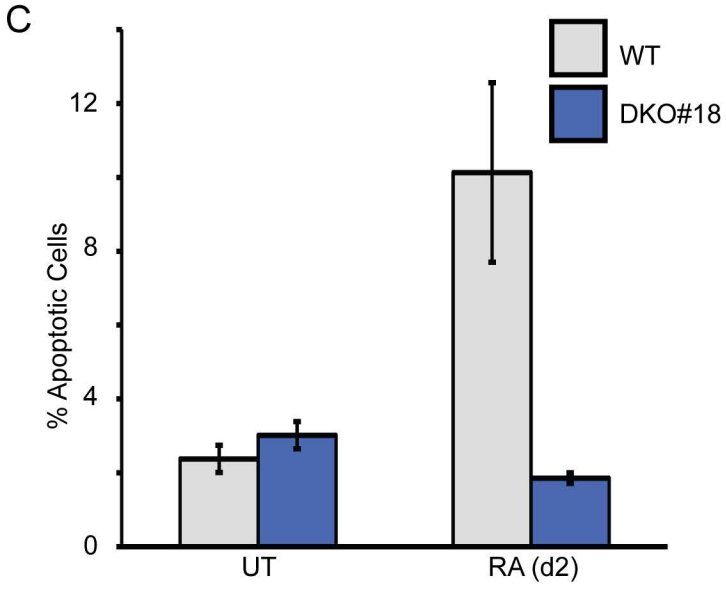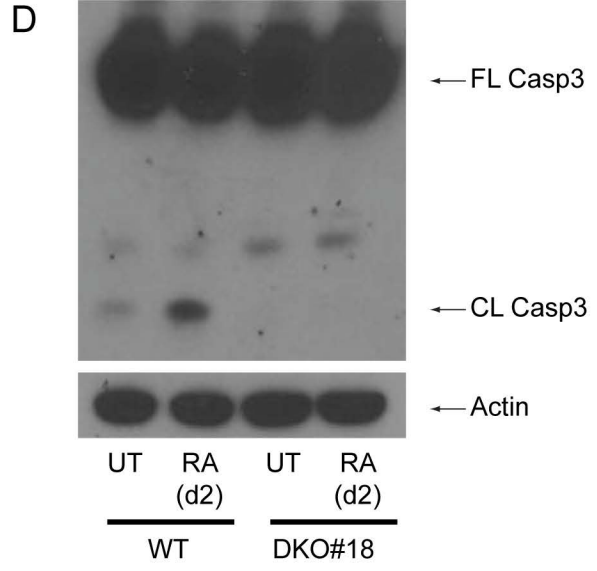

Figure S3: Representative FACS Plots

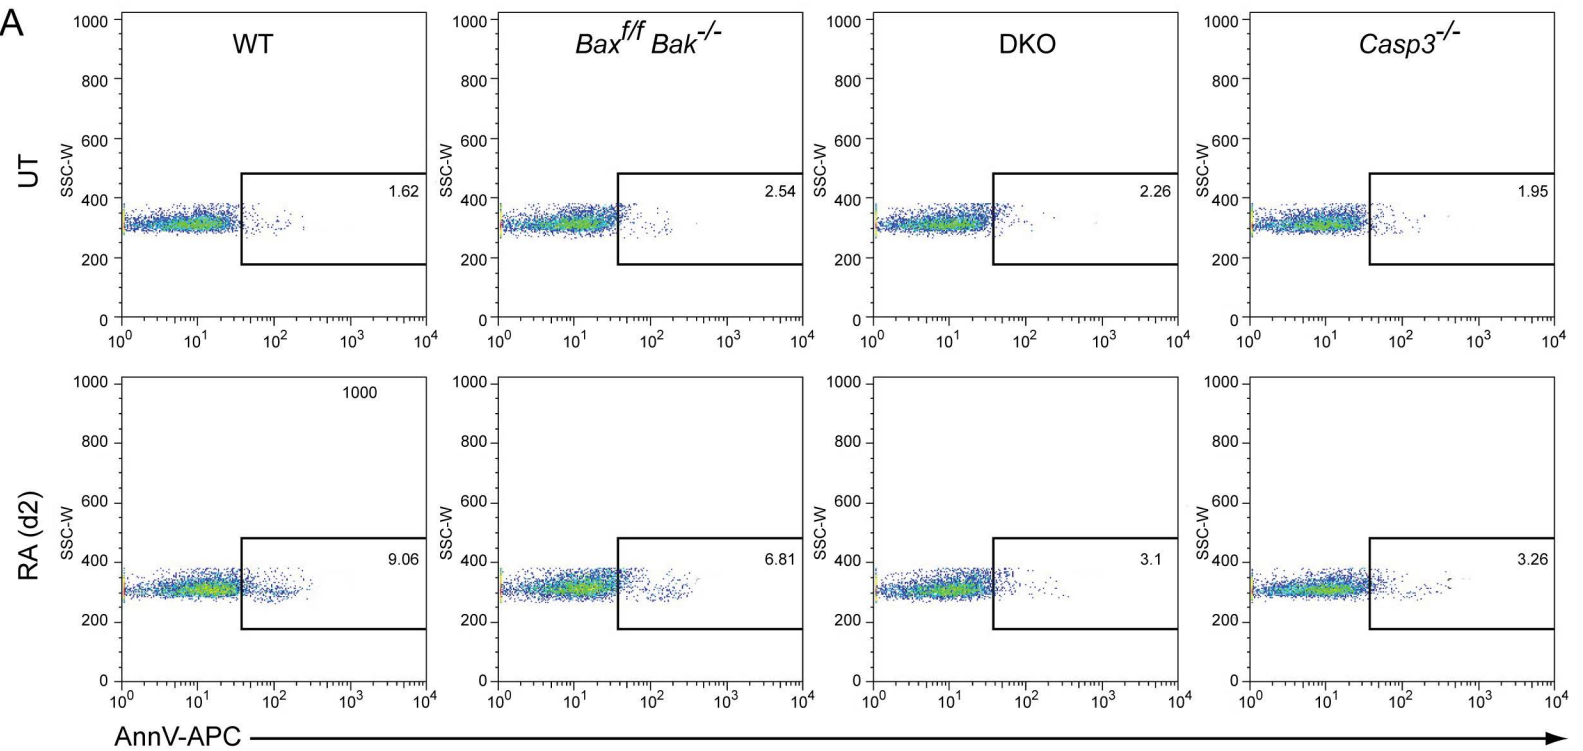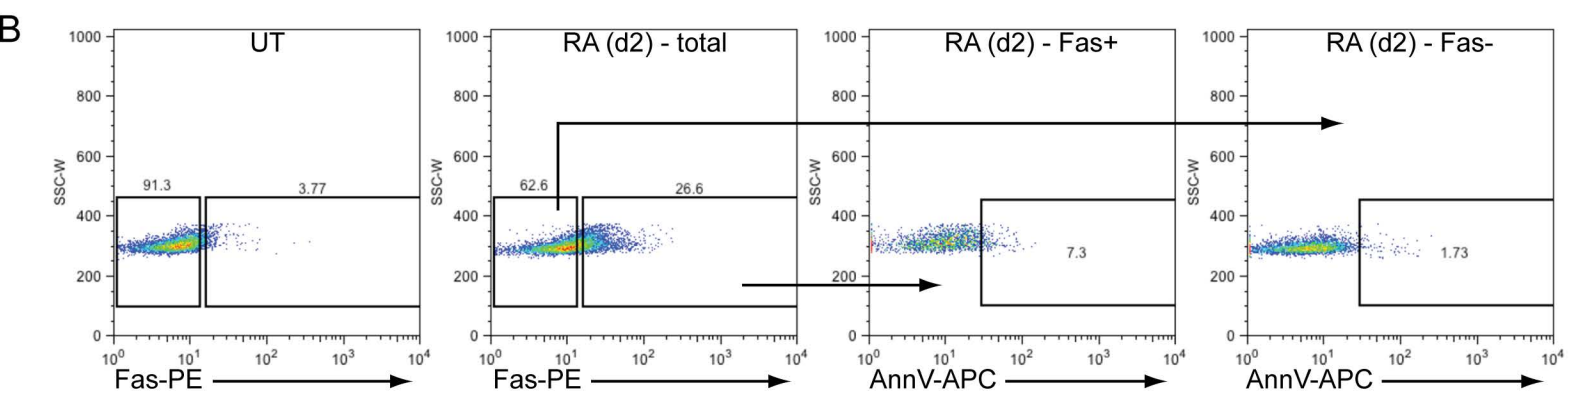

Figure S4: Core Pluripotency Factors Do Not Transcriptionally Regulate Expression of Aurora Kinase A

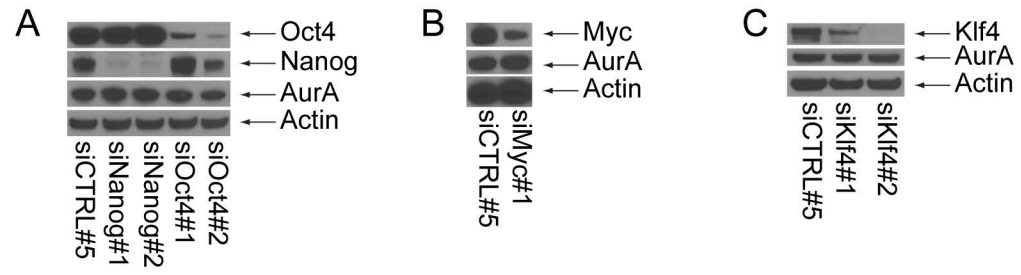

**Figure S1, related to Figure 1. Generation and analysis of *Bax/Bak*-deficient Embryonic Stem Cells.**

(A) *Bax* and *Bak* genotyping results from three independent *Bax<sup>fl/fl</sup>Bak<sup>-/-</sup>* ESCs lines. Wildtype ESCs are shown as a control. (B) *Bax* mRNA levels in three independently transfected lines via quantitative RT-PCR. Clones were derived from transfection of *Cre* recombinase in the parental line, “ESC line B,” followed by selection in puromycin. (C) *Bax* protein levels after *Cre* mediated excision. (D) *Cre* genotyping results in three DKO lines. DKO, *Bax<sup>-/-</sup>Bak<sup>-/-</sup>* double knockout. (E) Cell count of undifferentiated WT and DKO ESCs over time. (F) Immunoblot of Nanog and Oct4 from undifferentiated ESCs. (G) Representative metaphase spreads from DKO#17 (20/25 had 40XY karyotype) and DKO#18 (18/20 had 40XY karyotype) ESCs. (H) *Cre* genotyping from wildtype ESC 24 hours post-transfection and from individual ESC lines. (I) Immunoblot for Nanog from wildtype and two *Cre*-negative wildtype ESC lines after 2 days of RA treatment. (J) Immunoblot for Oct4 from wildtype and two *Cre*-negative wildtype ESC lines after 3 days of RA treatment. (K) Immunoblot for Nanog and Oct4 from DKO ESCs after 4 days of RA treatment and DKO ESCs that were allowed to recover in pluripotent conditions after RA-mediated differentiation. (L) Immunoblot for Nanog and Oct4 from DKO ESCs that were allowed to recover in pluripotent conditions after RA-mediated differentiation and then re-treated with RA for 2 days.

**Figure S2, related to Figure 1. Analysis of DKO#18 ESC Line.**

(A) Immunoblot for Nanog from wildtype or DKO#18 ESCs after 2 days of RA treatment.  
(B) Immunoblot for Oct4 from wildtype or DKO#18 ESCs after 3 days of RA treatment.

(C) Quantification of percent apoptotic cells (AnnexinV positive/PI negative) during RA-mediated differentiation of DKO#18 ESCs. (D) Immunoblot for full-length (FL) and cleaved (CL) Caspase-3 from wildtype and DKO#18 ESCs after 2 days of RA treatment.

**Figure S3, related to Figure 2. Representative FACS Plots.**

(A) Representative FACS plots of AnnexinV-stained ESCs after RA treatment. (B) Representative FACS plots of untreated and RA-treated WT ESCs stained for Fas and AnnexinV.

**Figure S4, related to Figure 4. Core Pluripotency Factors do not Transcriptionally Regulate Expression of Aurora Kinase A**

Immunoblot for AurA after siRNA knockdowns of (A) Oct4 and Nanog, (B) c-Myc, and (C) Klf4.

Table S1: Microarray Analysis for Apoptotic Proteins

| <b>SYMBOL</b> | <b>FOLD REGULATION</b> | <b>SYMBOL</b> | <b>FOLD REGULATION</b> |
|---------------|------------------------|---------------|------------------------|
| Fas           | 31.2691                | Kras          | -1.4506                |
| Cdkn2a        | 20.7734                | Il6           | -1.4845                |
| Egfr          | 16.374                 | RTC           | -1.4983                |
| Cdkn1a        | 14.2874                | E2f3          | -1.5157                |
| Jun           | 8.0371                 | RTC           | -1.5547                |
| B2m           | 7.7097                 | Cdk1          | -1.6283                |
| Mdm2          | 5.6178                 | Bid           | -1.7411                |
| Btg2          | 4.122                  | PPC           | -1.7613                |
| Wt1           | 3.793                  | Cdc25a        | -1.7654                |
| Fasl          | 2.783                  | Xrcc4         | -1.7695                |
| Rprm          | 2.7447                 | Bax           | -1.7859                |
| Apaf1         | 2.7321                 | Ccne1         | -1.8025                |
| Pmaip1        | 2.682                  | Myod1         | -1.8361                |
| Tnfrsf10b     | 2.5609                 | Tnf           | -1.8361                |
| Actb          | 2.4852                 | Trp63         | -1.8361                |
| Prkca         | 2.468                  | MGDC          | -1.8361                |
| Bcl2          | 2.2658                 | Bnip3         | -1.9141                |
| Rb1           | 2.0898                 | E2f1          | -1.9274                |
| Rela          | 2.0046                 | RTC           | -1.9498                |
| Sfn           | 1.7901                 | PPC           | -1.9543                |
| Ercc1         | 1.5764                 | Casp9         | -1.9679                |
| Bag1          | 1.5298                 | PPC           | -2.0139                |
| Nfkb1         | 1.4439                 | Cdk4          | -2.0849                |
| Fadd          | 1.3755                 | Trp53         | -2.2243                |
| Cul9          | 1.3535                 | Casp2         | -2.2501                |
| Serpib5       | 1.2599                 | Dnmt1         | -2.2658                |
| Traf1         | 1.2541                 | Apex1         | -2.555                 |
| Esr1          | 1.217                  | Birc5         | -2.6451                |
| Myc           | 1.1514                 | Prc1          | -2.9828                |
| Trp53bp2      | 1.1514                 | Atm           | -3.3636                |
| Nf1           | 1.0994                 | Cdc25c        | -3.6893                |
| Ppm1d         | 1.0943                 | Msh2          | -3.7064                |
| Hif1a         | 1.0718                 | Chek1         | -3.7235                |
| Gapdh         | 1                      | Mlh1          | -3.9177                |
| Zmat3         | -1.0644                | Pcna          | -4.0465                |
| Foxo3         | -1.0792                | Ccnb1         | -4.1506                |
| Gusb          | -1.0943                | Trp73         | -4.1506                |
| Dapk1         | -1.0994                | Atr           | -4.3169                |
| Stat1         | -1.1277                | Pttg1         | -4.5002                |
| Lig4          | -1.192                 | Sirt1         | -4.6482                |
| Hsp90ab1      | -1.2311                | Bbc3          | -5.0397                |
| Sesn2         | -1.2687                | Mdm4          | -5.0747                |
| Ep300         | -1.2716                | Brca1         | -5.4139                |
| Gadd45a       | -1.3013                | Xrcc5         | -5.4139                |
| Ccng1         | -1.3226                | Cradd         | -5.5404                |
| Pten          | -1.3256                | Egr1          | -5.6308                |
| Mcl1          | -1.3692                | Chek2         | -6.4234                |
| Ccnh          | -1.434                 | Brca2         | -7.447                 |

\*normalized to GAPDH

## Supplemental Experimental Procedures

### *Generation of $Bax^{-/-}Bak^{-/-}$ ESCs*

ESCs were obtained from timed matings of  $Bax^{ff}Bak^{-/-}$  animals.  $Bax^{flox}$  [S1] and  $Bak^{-/-}$  [S2] mice were backcrossed to C57BL/6J background for 6 generations before breeding together. Blastocysts were harvested at E3.5, plated on irradiated MEFs, trypsinized and allowed to grow until confluency. Three independent lines were obtained and transfected with pCre-pac. Cells were selected with puromycin at 2  $\mu\text{g}/\text{ml}$  for 1 week until visible colonies formed. Four independent clones were screened for  $Bax$  mRNA and protein levels, and genotyped for  $Cre$  recombinase.

### *Western Blots and Antibodies*

Cells were lysed in M-PER buffer (Thermo Scientific) containing protease/phosphatase inhibitor cocktail (Cell Signaling). Protein concentration was measured using a BCA assay (Pierce). Equivalent amounts of each sample were loaded on 10% Bis-Tris gels (Invitrogen), transferred to PVDF membranes, and immunoblotted with antibodies against Bax, Nanog, p53,  $\gamma$ -H2AX, FAS (human), Casp3, Casp8, and cleaved Casp8 (Cell Signaling Technology); Fas (M-20), Fas-L (N-20), and Oct4 (Santa Cruz Biotechnology); Bid (R&D Biosystems); AurA (BD Biosciences), and Actin (Sigma). Horseradish peroxidase-conjugated secondary antibodies were purchased from Jackson ImmunoResearch. Membranes were developed with SuperSignal West Chemiluminescent Substrate (Thermo Scientific).



### *Karyotyping Analysis*

DKO#18 ESCs were submitted to Cell Line Genetics (Madison, WI) for analysis, while DKO#17 ESCs were analyzed in-house. Briefly, embryonic stem cells were grown to confluency in a well of a 6-well plate. The cells were harvested and incubated in 8ml of 0.56% (w/v) KCl for 10 min at 37C. 2ml of fixative solution (3:1 Methanol:Glacial acetic acid) were then added. The cells were subsequently washed three times in fixative solution. After the washes, the cells were resuspended in 1ml fixative solution. Pre-cooled slides (Superfrost Plus slides incubated at -20°C in EtOH) were cleaned and moistened, and single drops of cells in fixative were dropped onto slides from a height of 0.5m. Slides were allowed to dry for 24-72 hours at room temperature. The slides were stained with Leishman's stain in Gurr's buffer for 8 min, rinsed in running water and cleared twice with HistoClear. Metaphase spreads were visualized and documented on an epi microscope at 40X magnification.

### *Flow Cytometry and Antibodies*

Cells were harvested, washed in PBS twice, and incubated with AnnexinV-FITC (Biovision) or AnnexinV-APC (BD Pharmingen). Surface expression of FAS was measured using anti-mouse CD95-PE (clone 15A7, eBioscience) or a matched IgG1-PE isotype control (eBioscience); for analysis of Fas, cells were collected in citric saline (135mM potassium chloride, 15mM sodium citrate) with 1mM EDTA to avoid enzymatic digest of cell surface proteins. Propidium iodide (Biovision) or 4',6-diamidino-2-phenylindole (DAPI; Invitrogen) was added to cells immediately before flow cytometry analysis.

### Quantitative RT-PCR

Total RNA was extracted from ESCs using Trizol (Invitrogen) or RNeasy Mini Kit (Qiagen) (for *Bax* transcript levels). cDNA was generated using the SuperScript II Reverse Transcriptase Kit (Invitrogen). Quantitative PCR was performed using Power SYBR Green PCR Master Mix (Applied Biosystems). *Bax* transcript levels were normalized to hypoxanthine phosphoribosyltransferase (*HPRT*), while other targets were normalized to 60S ribosomal protein-7 (*RPL7*). Samples were run in triplicate. Primer sequences are listed below.

### Oligonucleotides Used for Quantitative RT-PCR

|               | <b>Forward Primer (5' – 3')</b> | <b>Reverse Primer (5' – 3')</b> |
|---------------|---------------------------------|---------------------------------|
| <i>Cre</i>    | CTGCATTACCGGTCGATGCAA           | TGCTAACCAGCGTTTTTCGTTCTGCC      |
| <i>Bax</i>    | GCTGACATGTTTGCTGATGG            | GATCAGCTCGGGCACTTTAG            |
| <i>Oct4</i>   | AAAGCCCTGCAGAAGGAGCTAGAA        | AACACCTTTCCAAAGAGAACGCC         |
| <i>Nanog</i>  | AAAGCCCTGCAGAAGGAGCTAGAA        | TCCAGATGCGTTCACCAGATAG          |
| <i>RPL7</i>   | GATTGTGGAGCCATACATTGCA          | TGCCGTAGCCTCGCTTGT              |
| <i>Actin</i>  | CACAGCTTCTTTGCAGCTCCT           | CGTCATCCATGGCGAACTG             |
| <i>Fas#1</i>  | TGAATGGGGGTACACCAACC            | TTCCATGTTACACGAGGCG             |
| <i>Fas#2</i>  | AGATGCACACTCTGCGATGA            | AGGCGATTTCTGGGACTTTGT           |
| <i>FasL#1</i> | GAACTGGCAGAACTCCGTGA            | TGAGTGGGGGTTCCCTGTTA            |
| <i>FasL#2</i> | GGCTCTGGTTGGAATGGGAT            | GGTGTACTGGGGTTGGCTATT           |
| <i>p53#1</i>  | CGAAGACTGGATGACTGCCA            | CGTCCATGCAGTGAGGTGAT            |
| <i>p53#2</i>  | TGCTCACCCCTGGCTAAAGTT           | TCCGACTGTGACTCCTCCAT            |
| <i>AurA#1</i> | TGGATGCTGCAAACGGATAG            | TGAGACGGAATCTGCTCAGTC           |
| <i>AurA#2</i> | ACTCTCCAAGTTTGACGAGCA           | ACACATTGTGGTTCTCCTGGAAG         |

### Microarray Analysis

Wildtype ESCs were left untreated or differentiated for 4 days with RA, and relative message levels of select targets were analyzed using a SABioscience microarray (pamm-027Z). Data are displayed as fold change relative to untreated after normalization to GAPDH.

### *Alkaline Phosphatase Staining*

Untreated or RA treated ESCs were plated onto irradiated MEFs in a 6-well plate at 2000 cells/well and allowed to grow for a week or until visible colonies formed. Cells were washed with PBS, fixed, and stained for alkaline phosphatase using the Vector Red Alkaline Phosphatase Substrate Kit I (Vector Laboratories).

### *Teratoma Formation*

One million wildtype ( $Bax^{+/+} Bak^{+/+}$ ), parental ( $Bax^{ff} Bak^{-/-}$ ), DKO ( $Bax^{-/-} Bak^{-/-}$ ), or  $Casp3^{-/-}$  ESCs were injected subcutaneously into nude mice. Tumors that formed were isolated, sectioned, and stained with hematoxylin and eosin or anti-Oct4 (H-134; Santa Cruz Biotechnology #9081).

### *siRNA Knockdown*

ESCs were plated away from MEFs the day before transfection with Dharmafect1 (Dharmacon) and 50 nM siRNA. 24 hrs after transfection, the cells were treated with RA. siRNAs were purchased from Thermo Fisher Scientific against  $Casp8$  (D0-43044-

02 and -03), *Fas* (D-045283-19 and -20), and *AurA* (D-065109-01 and -03); a non-targeting siRNA (D-001210-05) was used as a control.

### *Immunofluorescence*

ESCs were left in undifferentiated conditions or treated with RA. Subsequently, they were collected and spun onto frosted glass slides (Fisher) using a Cytospin 4 (Thermo Scientific). Cells were fixed with 4% paraformaldehyde, permeabilized with 0.5% Triton-X, and stained with anti- $\gamma$ -H2AX (Cell Signaling) or by using an ApopTag (Millipore).  $\gamma$ -H2AX-positive or TUNEL-positive nuclei were quantified using Metamorph (Molecular Device Inc.). Results shown are mean  $\pm$  SD from at least three independent samples.

### **Supplemental References**

- S1. Takeuchi, O., Fisher, J., Suh, H., Harada, H., Malynn, B.A., and Korsmeyer, S.J. (2005). Essential role of BAX,BAK in B cell homeostasis and prevention of autoimmune disease. *Proceedings of the National Academy of Sciences of the United States of America* *102*, 11272-11277.
- S2. Lindsten, T., Ross, A.J., King, A., Zong, W.X., Rathmell, J.C., Shiels, H.A., Ulrich, E., Waymire, K.G., Mahar, P., Frauwirth, K., et al. (2000). The combined functions of proapoptotic Bcl-2 family members bak and bax are essential for normal development of multiple tissues. *Molecular cell* *6*, 1389-1399.
